# Supplementary material for: Celastrol Alleviates Airway Hyperresponsiveness and Inhibits Th17 Responses in Obese Asthmatic Mice
Source: PubMed Central journal article supplement (PMC5797758; doi:10.3389/fphar.2018.00049), 2018-01-31
Supplement: Data_Sheet_1.pdf [file Data_Sheet_1.pdf]

## Supplementary Material

# Celastrol Alleviates Airway Hyperresponsiveness and Inhibits Th17 Responses in Obese Asthmatic Mice

Zeyu Zeng\*<sup>†</sup>, Xixi Lin\*<sup>†</sup>, Rongying Zheng, Hui Zhang, Weixi Zhang\*

\* Correspondence: Weixi Zhang, [zhangweixi112@163.com](mailto:zhangweixi112@163.com)

<sup>†</sup>These authors contributed equally to this work

### 1 Supplementary Data

The post-hoc test utilized following ANOVA. Group 1 = Sham group, group 2 = OVA+DMSO group, group 3 = DIO+DMSO group, group 4 = DIO+OVA+DMSO group, group 5 = DIO+OVA+Celastrol group.

#### Multiple Comparisons

Dependent Variable: body mass (before celastrol treatment)

LSD

| (I) group | (J) group | Mean Difference (I-J) | Std. Error | Sig. | 95% Confidence Interval |             |
|-----------|-----------|-----------------------|------------|------|-------------------------|-------------|
|           |           |                       |            |      | Lower Bound             | Upper Bound |
| 1         | 2         | -.76667               | 1.04837    | .471 | -2.9258                 | 1.3925      |
|           | 3         | -13.25000*            | 1.04837    | .000 | -15.4092                | -11.0908    |
|           | 4         | -13.46667*            | 1.04837    | .000 | -15.6258                | -11.3075    |
|           | 5         | -13.41667*            | 1.04837    | .000 | -15.5758                | -11.2575    |
| 2         | 1         | .76667                | 1.04837    | .471 | -1.3925                 | 2.9258      |
|           | 3         | -12.48333*            | 1.04837    | .000 | -14.6425                | -10.3242    |
|           | 4         | -12.70000*            | 1.04837    | .000 | -14.8592                | -10.5408    |
|           | 5         | -12.65000*            | 1.04837    | .000 | -14.8092                | -10.4908    |
| 3         | 1         | 13.25000*             | 1.04837    | .000 | 11.0908                 | 15.4092     |
|           | 2         | 12.48333*             | 1.04837    | .000 | 10.3242                 | 14.6425     |
|           | 4         | -.21667               | 1.04837    | .838 | -2.3758                 | 1.9425      |
|           | 5         | -.16667               | 1.04837    | .875 | -2.3258                 | 1.9925      |
| 4         | 1         | 13.46667*             | 1.04837    | .000 | 11.3075                 | 15.6258     |
|           | 2         | 12.70000*             | 1.04837    | .000 | 10.5408                 | 14.8592     |
|           | 3         | .21667                | 1.04837    | .838 | -1.9425                 | 2.3758      |
|           | 5         | .05000                | 1.04837    | .962 | -2.1092                 | 2.2092      |
| 5         | 1         | 13.41667*             | 1.04837    | .000 | 11.2575                 | 15.5758     |
|           | 2         | 12.65000*             | 1.04837    | .000 | 10.4908                 | 14.8092     |
|           | 3         | .16667                | 1.04837    | .875 | -1.9925                 | 2.3258      |
|           | 4         | -.05000               | 1.04837    | .962 | -2.2092                 | 2.1092      |

\*. The mean difference is significant at the .05 level.

## Multiple Comparisons

Dependent Variable: body mass (after celastrol treatment)

LSD

| (I) group | (J) group | Mean Difference (I-J) | Std. Error | Sig. | 95% Confidence Interval |             |
|-----------|-----------|-----------------------|------------|------|-------------------------|-------------|
|           |           |                       |            |      | Lower Bound             | Upper Bound |
| 1         | 2         | -.10000               | 1.05303    | .925 | -2.2688                 | 2.0688      |
|           | 3         | -13.43333*            | 1.05303    | .000 | -15.6021                | -11.2646    |
|           | 4         | -13.41667*            | 1.05303    | .000 | -15.5854                | -11.2479    |
|           | 5         | -3.71667*             | 1.05303    | .002 | -5.8854                 | -1.5479     |
| 2         | 1         | .10000                | 1.05303    | .925 | -2.0688                 | 2.2688      |
|           | 3         | -13.33333*            | 1.05303    | .000 | -15.5021                | -11.1646    |
|           | 4         | -13.31667*            | 1.05303    | .000 | -15.4854                | -11.1479    |
|           | 5         | -3.61667*             | 1.05303    | .002 | -5.7854                 | -1.4479     |
| 3         | 1         | 13.43333*             | 1.05303    | .000 | 11.2646                 | 15.6021     |
|           | 2         | 13.33333*             | 1.05303    | .000 | 11.1646                 | 15.5021     |
|           | 4         | .01667                | 1.05303    | .987 | -2.1521                 | 2.1854      |
|           | 5         | 9.71667*              | 1.05303    | .000 | 7.5479                  | 11.8854     |
| 4         | 1         | 13.41667*             | 1.05303    | .000 | 11.2479                 | 15.5854     |
|           | 2         | 13.31667*             | 1.05303    | .000 | 11.1479                 | 15.4854     |
|           | 3         | -.01667               | 1.05303    | .987 | -2.1854                 | 2.1521      |
|           | 5         | 9.70000*              | 1.05303    | .000 | 7.5312                  | 11.8688     |
| 5         | 1         | 3.71667*              | 1.05303    | .002 | 1.5479                  | 5.8854      |
|           | 2         | 3.61667*              | 1.05303    | .002 | 1.4479                  | 5.7854      |
|           | 3         | -9.71667*             | 1.05303    | .000 | -11.8854                | -7.5479     |
|           | 4         | -9.70000*             | 1.05303    | .000 | -11.8688                | -7.5312     |

\*. The mean difference is significant at the .05 level.

### Multiple Comparisons

Dependent Variable: body mass reduction

LSD

| (I) group | (J) group | Mean Difference (I-J) | Std. Error | Sig. | 95% Confidence Interval |             |
|-----------|-----------|-----------------------|------------|------|-------------------------|-------------|
|           |           |                       |            |      | Lower Bound             | Upper Bound |
| 1         | 2         | .66667                | .75903     | .388 | -.8966                  | 2.2299      |
|           | 3         | -.18333               | .75903     | .811 | -1.7466                 | 1.3799      |
|           | 4         | .05000                | .75903     | .948 | -1.5133                 | 1.6133      |
|           | 5         | 9.70000*              | .75903     | .000 | 8.1367                  | 11.2633     |
| 2         | 1         | -.66667               | .75903     | .388 | -2.2299                 | .8966       |
|           | 3         | -.85000               | .75903     | .273 | -2.4133                 | .7133       |
|           | 4         | -.61667               | .75903     | .424 | -2.1799                 | .9466       |
|           | 5         | 9.03333*              | .75903     | .000 | 7.4701                  | 10.5966     |
| 3         | 1         | .18333                | .75903     | .811 | -1.3799                 | 1.7466      |
|           | 2         | .85000                | .75903     | .273 | -.7133                  | 2.4133      |
|           | 4         | .23333                | .75903     | .761 | -1.3299                 | 1.7966      |
|           | 5         | 9.88333*              | .75903     | .000 | 8.3201                  | 11.4466     |
| 4         | 1         | -.05000               | .75903     | .948 | -1.6133                 | 1.5133      |
|           | 2         | .61667                | .75903     | .424 | -.9466                  | 2.1799      |
|           | 3         | -.23333               | .75903     | .761 | -1.7966                 | 1.3299      |
|           | 5         | 9.65000*              | .75903     | .000 | 8.0867                  | 11.2133     |
| 5         | 1         | -9.70000*             | .75903     | .000 | -11.2633                | -8.1367     |
|           | 2         | -9.03333*             | .75903     | .000 | -10.5966                | -7.4701     |
|           | 3         | -9.88333*             | .75903     | .000 | -11.4466                | -8.3201     |
|           | 4         | -9.65000*             | .75903     | .000 | -11.2133                | -8.0867     |

\*. The mean difference is significant at the .05 level.

## Multiple Comparisons

Dependent Variable: Baseline Rn

LSD

| (I) group | (J) group | Mean Difference (I-J) | Std. Error | Sig. | 95% Confidence Interval |             |
|-----------|-----------|-----------------------|------------|------|-------------------------|-------------|
|           |           |                       |            |      | Lower Bound             | Upper Bound |
| 1         | 2         | -.19598333*           | .04199213  | .000 | -.2824677               | -.1094989   |
|           | 3         | -.09803333*           | .04199213  | .028 | -.1845177               | -.0115489   |
|           | 4         | -.30481667*           | .04199213  | .000 | -.3913011               | -.2183323   |
|           | 5         | -.06236667            | .04199213  | .150 | -.1488511               | .0241177    |
| 2         | 1         | .19598333*            | .04199213  | .000 | .1094989                | .2824677    |
|           | 3         | .09795000*            | .04199213  | .028 | .0114656                | .1844344    |
|           | 4         | -.10883333*           | .04199213  | .016 | -.1953177               | -.0223489   |
|           | 5         | .13361667*            | .04199213  | .004 | .0471323                | .2201011    |
| 3         | 1         | .09803333*            | .04199213  | .028 | .0115489                | .1845177    |
|           | 2         | -.09795000*           | .04199213  | .028 | -.1844344               | -.0114656   |
|           | 4         | -.20678333*           | .04199213  | .000 | -.2932677               | -.1202989   |
|           | 5         | .03566667             | .04199213  | .404 | -.0508177               | .1221511    |
| 4         | 1         | .30481667*            | .04199213  | .000 | .2183323                | .3913011    |
|           | 2         | .10883333*            | .04199213  | .016 | .0223489                | .1953177    |
|           | 3         | .20678333*            | .04199213  | .000 | .1202989                | .2932677    |
|           | 5         | .24245000*            | .04199213  | .000 | .1559656                | .3289344    |
| 5         | 1         | .06236667             | .04199213  | .150 | -.0241177               | .1488511    |
|           | 2         | -.13361667*           | .04199213  | .004 | -.2201011               | -.0471323   |
|           | 3         | -.03566667            | .04199213  | .404 | -.1221511               | .0508177    |
|           | 4         | -.24245000*           | .04199213  | .000 | -.3289344               | -.1559656   |

\*. The mean difference is significant at the .05 level.

### Multiple Comparisons

Dependent Variable: Rn (% of baseline, 50 mg/mL)

LSD

| (I) group | (J) group | Mean Difference (I-J) | Std. Error | Sig. | 95% Confidence Interval |              |
|-----------|-----------|-----------------------|------------|------|-------------------------|--------------|
|           |           |                       |            |      | Lower Bound             | Upper Bound  |
| 1         | 2         | -121.20262*           | 2.892626   | .000 | -127.1600915            | -115.2451419 |
|           | 3         | -64.365733*           | 2.892626   | .000 | -70.3232081             | -58.4082585  |
|           | 4         | -198.04807*           | 2.892626   | .000 | -204.0055415            | -192.0905919 |
|           | 5         | -4.1090333            | 2.892626   | .168 | -10.0665081             | 1.8484415    |
| 2         | 1         | 121.20262*            | 2.892626   | .000 | 115.2451419             | 127.1600915  |
|           | 3         | 56.836883*            | 2.892626   | .000 | 50.8794085              | 62.7943581   |
|           | 4         | -76.845450*           | 2.892626   | .000 | -82.8029248             | -70.8879752  |
|           | 5         | 117.09358*            | 2.892626   | .000 | 111.1361085             | 123.0510581  |
| 3         | 1         | 64.365733*            | 2.892626   | .000 | 58.4082585              | 70.3232081   |
|           | 2         | -56.836883*           | 2.892626   | .000 | -62.7943581             | -50.8794085  |
|           | 4         | -133.68233*           | 2.892626   | .000 | -139.6398081            | -127.7248585 |
|           | 5         | 60.256700*            | 2.892626   | .000 | 54.2992252              | 66.2141748   |
| 4         | 1         | 198.04807*            | 2.892626   | .000 | 192.0905919             | 204.0055415  |
|           | 2         | 76.845450*            | 2.892626   | .000 | 70.8879752              | 82.8029248   |
|           | 3         | 133.68233*            | 2.892626   | .000 | 127.7248585             | 139.6398081  |
|           | 5         | 193.93903*            | 2.892626   | .000 | 187.9815585             | 199.8965081  |
| 5         | 1         | 4.10903333            | 2.892626   | .168 | -1.8484415              | 10.0665081   |
|           | 2         | -117.09358*           | 2.892626   | .000 | -123.0510581            | -111.1361085 |
|           | 3         | -60.256700*           | 2.892626   | .000 | -66.2141748             | -54.2992252  |
|           | 4         | -193.93903*           | 2.892626   | .000 | -199.8965081            | -187.9815585 |

\*. The mean difference is significant at the .05 level.

## Multiple Comparisons

Dependent Variable: Rn (% of baseline, 25 mg/mL)

LSD

| (I) group | (J) group | Mean Difference (I-J) | Std. Error | Sig. | 95% Confidence Interval |              |
|-----------|-----------|-----------------------|------------|------|-------------------------|--------------|
|           |           |                       |            |      | Lower Bound             | Upper Bound  |
| 1         | 2         | -87.039117*           | 2.156436   | .000 | -91.4803795             | -82.5978539  |
|           | 3         | -40.638433*           | 2.156436   | .000 | -45.0796961             | -36.1971705  |
|           | 4         | -153.71038*           | 2.156436   | .000 | -158.1516461            | -149.2691205 |
|           | 5         | -2.1604667            | 2.156436   | .326 | -6.6017295              | 2.2807961    |
| 2         | 1         | 87.039117*            | 2.156436   | .000 | 82.5978539              | 91.4803795   |
|           | 3         | 46.400683*            | 2.156436   | .000 | 41.9594205              | 50.8419461   |
|           | 4         | -66.671267*           | 2.156436   | .000 | -71.1125295             | -62.2300039  |
|           | 5         | 84.878650*            | 2.156436   | .000 | 80.4373872              | 89.3199128   |
| 3         | 1         | 40.638433*            | 2.156436   | .000 | 36.1971705              | 45.0796961   |
|           | 2         | -46.400683*           | 2.156436   | .000 | -50.8419461             | -41.9594205  |
|           | 4         | -113.07195*           | 2.156436   | .000 | -117.5132128            | -108.6306872 |
|           | 5         | 38.477967*            | 2.156436   | .000 | 34.0367039              | 42.9192295   |
| 4         | 1         | 153.71038*            | 2.156436   | .000 | 149.2691205             | 158.1516461  |
|           | 2         | 66.671267*            | 2.156436   | .000 | 62.2300039              | 71.1125295   |
|           | 3         | 113.07195*            | 2.156436   | .000 | 108.6306872             | 117.5132128  |
|           | 5         | 151.54992*            | 2.156436   | .000 | 147.1086539             | 155.9911795  |
| 5         | 1         | 2.1604667             | 2.156436   | .326 | -2.2807961              | 6.6017295    |
|           | 2         | -84.878650*           | 2.156436   | .000 | -89.3199128             | -80.4373872  |
|           | 3         | -38.477967*           | 2.156436   | .000 | -42.9192295             | -34.0367039  |
|           | 4         | -151.54992*           | 2.156436   | .000 | -155.9911795            | -147.1086539 |

\*. The mean difference is significant at the .05 level.

### Multiple Comparisons

Dependent Variable: Rn (% of baseline, 12.5 mg/mL)

LSD

| (I) group | (J) group | Mean Difference (I-J) | Std. Error | Sig. | 95% Confidence Interval |              |
|-----------|-----------|-----------------------|------------|------|-------------------------|--------------|
|           |           |                       |            |      | Lower Bound             | Upper Bound  |
| 1         | 2         | -62.904067*           | 2.724981   | .000 | -68.5162710             | -57.2918623  |
|           | 3         | -23.993450*           | 2.724981   | .000 | -29.6056544             | -18.3812456  |
|           | 4         | -118.17373*           | 2.724981   | .000 | -123.7859377            | -112.5615290 |
|           | 5         | -1.8537500            | 2.724981   | .503 | -7.4659544              | 3.7584544    |
| 2         | 1         | 62.904067*            | 2.724981   | .000 | 57.2918623              | 68.5162710   |
|           | 3         | 38.910617*            | 2.724981   | .000 | 33.2984123              | 44.5228210   |
|           | 4         | -55.269667*           | 2.724981   | .000 | -60.8818710             | -49.6574623  |
|           | 5         | 61.050317*            | 2.724981   | .000 | 55.4381123              | 66.6625210   |
| 3         | 1         | 23.993450*            | 2.724981   | .000 | 18.3812456              | 29.6056544   |
|           | 2         | -38.910617*           | 2.724981   | .000 | -44.5228210             | -33.2984123  |
|           | 4         | -94.180283*           | 2.724981   | .000 | -99.7924877             | -88.5680790  |
|           | 5         | 22.139700*            | 2.724981   | .000 | 16.5274956              | 27.7519044   |
| 4         | 1         | 118.17373*            | 2.724981   | .000 | 112.5615290             | 123.7859377  |
|           | 2         | 55.269667*            | 2.724981   | .000 | 49.6574623              | 60.8818710   |
|           | 3         | 94.180283*            | 2.724981   | .000 | 88.5680790              | 99.7924877   |
|           | 5         | 116.31998*            | 2.724981   | .000 | 110.7077790             | 121.9321877  |
| 5         | 1         | 1.85375000            | 2.724981   | .503 | -3.7584544              | 7.4659544    |
|           | 2         | -61.050317*           | 2.724981   | .000 | -66.6625210             | -55.4381123  |
|           | 3         | -22.139700*           | 2.724981   | .000 | -27.7519044             | -16.5274956  |
|           | 4         | -116.31998*           | 2.724981   | .000 | -121.9321877            | -110.7077790 |

\*. The mean difference is significant at the .05 level.

## Multiple Comparisons

Dependent Variable: Score of Histology Sections

LSD

| (I) group | (J) group | Mean Difference (I-J) | Std. Error | Sig. | 95% Confidence Interval |             |
|-----------|-----------|-----------------------|------------|------|-------------------------|-------------|
|           |           |                       |            |      | Lower Bound             | Upper Bound |
| 1         | 2         | -2.3166667*           | .14681810  | .000 | -2.6190442              | -2.0142891  |
|           | 3         | -1.4500000*           | .14681810  | .000 | -1.7523775              | -1.1476225  |
|           | 4         | -3.1000000*           | .14681810  | .000 | -3.4023775              | -2.7976225  |
|           | 5         | -.58333333*           | .14681810  | .001 | -.8857109               | -.2809558   |
| 2         | 1         | 2.31666667*           | .14681810  | .000 | 2.0142891               | 2.6190442   |
|           | 3         | .86666667*            | .14681810  | .000 | .5642891                | 1.1690442   |
|           | 4         | -.78333333*           | .14681810  | .000 | -1.0857109              | -.4809558   |
|           | 5         | 1.73333333*           | .14681810  | .000 | 1.4309558               | 2.0357109   |
| 3         | 1         | 1.45000000*           | .14681810  | .000 | 1.1476225               | 1.7523775   |
|           | 2         | -.86666667*           | .14681810  | .000 | -1.1690442              | -.5642891   |
|           | 4         | -1.6500000*           | .14681810  | .000 | -1.9523775              | -1.3476225  |
|           | 5         | .86666667*            | .14681810  | .000 | .5642891                | 1.1690442   |
| 4         | 1         | 3.10000000*           | .14681810  | .000 | 2.7976225               | 3.4023775   |
|           | 2         | .78333333*            | .14681810  | .000 | .4809558                | 1.0857109   |
|           | 3         | 1.65000000*           | .14681810  | .000 | 1.3476225               | 1.9523775   |
|           | 5         | 2.51666667*           | .14681810  | .000 | 2.2142891               | 2.8190442   |
| 5         | 1         | .58333333*            | .14681810  | .001 | .2809558                | .8857109    |
|           | 2         | -1.73333333*          | .14681810  | .000 | -2.0357109              | -1.4309558  |
|           | 3         | -.86666667*           | .14681810  | .000 | -1.1690442              | -.5642891   |
|           | 4         | -2.5166667*           | .14681810  | .000 | -2.8190442              | -2.2142891  |

\*. The mean difference is significant at the .05 level.



### Multiple Comparisons

Dependent Variable: IL-17A OD in Lung  
LSD

| (I) group | (J) group | Mean Difference (I-J) | Std. Error | Sig. | 95% Confidence Interval |             |
|-----------|-----------|-----------------------|------------|------|-------------------------|-------------|
|           |           |                       |            |      | Lower Bound             | Upper Bound |
| 1         | 2         | -.17865000*           | .01476824  | .000 | -.2090658               | -.1482342   |
|           | 3         | -.13596667*           | .01476824  | .000 | -.1663824               | -.1055509   |
|           | 4         | -.32395000*           | .01476824  | .000 | -.3543658               | -.2935342   |
|           | 5         | .01411667             | .01476824  | .348 | -.0162991               | .0445324    |
| 2         | 1         | .17865000*            | .01476824  | .000 | .1482342                | .2090658    |
|           | 3         | .04268333*            | .01476824  | .008 | .0122676                | .0730991    |
|           | 4         | -.14530000*           | .01476824  | .000 | -.1757158               | -.1148842   |
|           | 5         | .19276667*            | .01476824  | .000 | .1623509                | .2231824    |
| 3         | 1         | .13596667*            | .01476824  | .000 | .1055509                | .1663824    |
|           | 2         | -.04268333*           | .01476824  | .008 | -.0730991               | -.0122676   |
|           | 4         | -.18798333*           | .01476824  | .000 | -.2183991               | -.1575676   |
|           | 5         | .15008333*            | .01476824  | .000 | .1196676                | .1804991    |
| 4         | 1         | .32395000*            | .01476824  | .000 | .2935342                | .3543658    |
|           | 2         | .14530000*            | .01476824  | .000 | .1148842                | .1757158    |
|           | 3         | .18798333*            | .01476824  | .000 | .1575676                | .2183991    |
|           | 5         | .33806667*            | .01476824  | .000 | .3076509                | .3684824    |
| 5         | 1         | -.01411667            | .01476824  | .348 | -.0445324               | .0162991    |
|           | 2         | -.19276667*           | .01476824  | .000 | -.2231824               | -.1623509   |
|           | 3         | -.15008333*           | .01476824  | .000 | -.1804991               | -.1196676   |
|           | 4         | -.33806667*           | .01476824  | .000 | -.3684824               | -.3076509   |

\*. The mean difference is significant at the .05 level.

## Multiple Comparisons

Dependent Variable: Th17 (% of CD4+T Cell)

LSD

| (I) group | (J) group | Mean Difference (I-J) | Std. Error | Sig. | 95% Confidence Interval |             |
|-----------|-----------|-----------------------|------------|------|-------------------------|-------------|
|           |           |                       |            |      | Lower Bound             | Upper Bound |
| 1         | 2         | -6.2776667*           | .76973759  | .000 | -7.8629709              | -4.6923624  |
|           | 3         | -3.3655000*           | .76973759  | .000 | -4.9508042              | -1.7801958  |
|           | 4         | -12.241333*           | .76973759  | .000 | -13.8266376             | -10.6560291 |
|           | 5         | -1.1688333            | .76973759  | .141 | -2.7541376              | .4164709    |
| 2         | 1         | 6.2776667*            | .76973759  | .000 | 4.6923624               | 7.8629709   |
|           | 3         | 2.91216667*           | .76973759  | .001 | 1.3268624               | 4.4974709   |
|           | 4         | -5.9636667*           | .76973759  | .000 | -7.5489709              | -4.3783624  |
|           | 5         | 5.10883333*           | .76973759  | .000 | 3.5235291               | 6.6941376   |
| 3         | 1         | 3.36550000*           | .76973759  | .000 | 1.7801958               | 4.9508042   |
|           | 2         | -2.91216667*          | .76973759  | .001 | -4.4974709              | -1.3268624  |
|           | 4         | -8.8758333*           | .76973759  | .000 | -10.4611376             | -7.2905291  |
|           | 5         | 2.19666667*           | .76973759  | .009 | .6113624                | 3.7819709   |
| 4         | 1         | 12.241333*            | .76973759  | .000 | 10.6560291              | 13.8266376  |
|           | 2         | 5.96366667*           | .76973759  | .000 | 4.3783624               | 7.5489709   |
|           | 3         | 8.87583333*           | .76973759  | .000 | 7.2905291               | 10.4611376  |
|           | 5         | 11.072500*            | .76973759  | .000 | 9.4871958               | 12.6578042  |
| 5         | 1         | 1.16883333            | .76973759  | .141 | -.4164709               | 2.7541376   |
|           | 2         | -5.1088333*           | .76973759  | .000 | -6.6941376              | -3.5235291  |
|           | 3         | -2.1966667*           | .76973759  | .009 | -3.7819709              | -.6113624   |
|           | 4         | -11.072500*           | .76973759  | .000 | -12.6578042             | -9.4871958  |

\*. The mean difference is significant at the .05 level.

### Multiple Comparisons

Dependent Variable: Serum IL-17A

LSD

| (I) group | (J) group | Mean Difference (I-J) | Std. Error | Sig. | 95% Confidence Interval |             |
|-----------|-----------|-----------------------|------------|------|-------------------------|-------------|
|           |           |                       |            |      | Lower Bound             | Upper Bound |
| 1         | 2         | -79.61000*            | 3.837920   | .000 | -87.5143449             | -71.7056551 |
|           | 3         | -51.965000*           | 3.837920   | .000 | -59.8693449             | -44.0606551 |
|           | 4         | -96.938333*           | 3.837920   | .000 | -104.8426782            | -89.0339885 |
|           | 5         | -17.991667*           | 3.837920   | .000 | -25.8960115             | -10.0873218 |
| 2         | 1         | 79.610000*            | 3.837920   | .000 | 71.7056551              | 87.5143449  |
|           | 3         | 27.645000*            | 3.837920   | .000 | 19.7406551              | 35.5493449  |
|           | 4         | -17.328333*           | 3.837920   | .000 | -25.2326782             | -9.4239885  |
|           | 5         | 61.618333*            | 3.837920   | .000 | 53.7139885              | 69.5226782  |
| 3         | 1         | 51.965000*            | 3.837920   | .000 | 44.0606551              | 59.8693449  |
|           | 2         | -27.645000*           | 3.837920   | .000 | -35.5493449             | -19.7406551 |
|           | 4         | -44.973333*           | 3.837920   | .000 | -52.8776782             | -37.0689885 |
|           | 5         | 33.973333*            | 3.837920   | .000 | 26.0689885              | 41.8776782  |
| 4         | 1         | 96.938333*            | 3.837920   | .000 | 89.0339885              | 104.8426782 |
|           | 2         | 17.328333*            | 3.837920   | .000 | 9.4239885               | 25.2326782  |
|           | 3         | 44.973333*            | 3.837920   | .000 | 37.0689885              | 52.8776782  |
|           | 5         | 78.946667*            | 3.837920   | .000 | 71.0423218              | 86.8510115  |
| 5         | 1         | 17.991667*            | 3.837920   | .000 | 10.0873218              | 25.8960115  |
|           | 2         | -61.618333*           | 3.837920   | .000 | -69.5226782             | -53.7139885 |
|           | 3         | -33.973333*           | 3.837920   | .000 | -41.8776782             | -26.0689885 |
|           | 4         | -78.946667*           | 3.837920   | .000 | -86.8510115             | -71.0423218 |

\*. The mean difference is significant at the .05 level.

## Multiple Comparisons

Dependent Variable: Expression of IL-17A mRNA in Lung

LSD

| (I) group | (J) group | Mean Difference (I-J) | Std. Error | Sig. | 95% Confidence Interval |             |
|-----------|-----------|-----------------------|------------|------|-------------------------|-------------|
|           |           |                       |            |      | Lower Bound             | Upper Bound |
| 1         | 2         | -23.464772*           | 2.823417   | .000 | -29.2797073             | -17.6498364 |
|           | 3         | -11.022554*           | 2.823417   | .001 | -16.8374889             | -5.2076181  |
|           | 4         | -47.329007*           | 2.823417   | .000 | -53.1439423             | -41.5140714 |
|           | 5         | -1.7487387            | 2.823417   | .541 | -7.5636741              | 4.0661968   |
| 2         | 1         | 23.464772*            | 2.823417   | .000 | 17.6498364              | 29.2797073  |
|           | 3         | 12.442218*            | 2.823417   | .000 | 6.6272829               | 18.2571538  |
|           | 4         | -23.864235*           | 2.823417   | .000 | -29.6791704             | -18.0492996 |
|           | 5         | 21.716033*            | 2.823417   | .000 | 15.9010977              | 27.5309686  |
| 3         | 1         | 11.022554*            | 2.823417   | .001 | 5.2076181               | 16.8374889  |
|           | 2         | -12.442218*           | 2.823417   | .000 | -18.2571538             | -6.6272829  |
|           | 4         | -36.306453*           | 2.823417   | .000 | -42.1213888             | -30.4915179 |
|           | 5         | 9.27381483*           | 2.823417   | .003 | 3.4588794               | 15.0887503  |
| 4         | 1         | 47.329007*            | 2.823417   | .000 | 41.5140714              | 53.1439423  |
|           | 2         | 23.864235*            | 2.823417   | .000 | 18.0492996              | 29.6791704  |
|           | 3         | 36.306453*            | 2.823417   | .000 | 30.4915179              | 42.1213888  |
|           | 5         | 45.580268*            | 2.823417   | .000 | 39.7653327              | 51.3952036  |
| 5         | 1         | 1.74873867            | 2.823417   | .541 | -4.0661968              | 7.5636741   |
|           | 2         | -21.716033*           | 2.823417   | .000 | -27.5309686             | -15.9010977 |
|           | 3         | -9.2738148*           | 2.823417   | .003 | -15.0887503             | -3.4588794  |
|           | 4         | -45.580268*           | 2.823417   | .000 | -51.3952036             | -39.7653327 |

\*. The mean difference is significant at the .05 level.

### Multiple Comparisons

Dependent Variable: OVA-IgE (U/mL)

LSD

| (I) group | (J) group | Mean Difference (I-J) | Std. Error | Sig. | 95% Confidence Interval |             |
|-----------|-----------|-----------------------|------------|------|-------------------------|-------------|
|           |           |                       |            |      | Lower Bound             | Upper Bound |
| 1         | 2         | -33.77333*            | 1.49456    | .000 | -36.8514                | -30.6952    |
|           | 3         | -.56833               | 1.49456    | .707 | -3.6464                 | 2.5098      |
|           | 4         | -34.89500*            | 1.49456    | .000 | -37.9731                | -31.8169    |
|           | 5         | -14.97833*            | 1.49456    | .000 | -18.0564                | -11.9002    |
| 2         | 1         | 33.77333*             | 1.49456    | .000 | 30.6952                 | 36.8514     |
|           | 3         | 33.20500*             | 1.49456    | .000 | 30.1269                 | 36.2831     |
|           | 4         | -1.12167              | 1.49456    | .460 | -4.1998                 | 1.9564      |
|           | 5         | 18.79500*             | 1.49456    | .000 | 15.7169                 | 21.8731     |
| 3         | 1         | .56833                | 1.49456    | .707 | -2.5098                 | 3.6464      |
|           | 2         | -33.20500*            | 1.49456    | .000 | -36.2831                | -30.1269    |
|           | 4         | -34.32667*            | 1.49456    | .000 | -37.4048                | -31.2486    |
|           | 5         | -14.41000*            | 1.49456    | .000 | -17.4881                | -11.3319    |
| 4         | 1         | 34.89500*             | 1.49456    | .000 | 31.8169                 | 37.9731     |
|           | 2         | 1.12167               | 1.49456    | .460 | -1.9564                 | 4.1998      |
|           | 3         | 34.32667*             | 1.49456    | .000 | 31.2486                 | 37.4048     |
|           | 5         | 19.91667*             | 1.49456    | .000 | 16.8386                 | 22.9948     |
| 5         | 1         | 14.97833*             | 1.49456    | .000 | 11.9002                 | 18.0564     |
|           | 2         | -18.79500*            | 1.49456    | .000 | -21.8731                | -15.7169    |
|           | 3         | 14.41000*             | 1.49456    | .000 | 11.3319                 | 17.4881     |
|           | 4         | -19.91667*            | 1.49456    | .000 | -22.9948                | -16.8386    |

\*. The mean difference is significant at the .05 level.

## Multiple Comparisons

Dependent Variable: OVA-IgG1 (mg/mL)

LSD

| (I) group | (J) group | Mean Difference (I-J) | Std. Error | Sig. | 95% Confidence Interval |             |
|-----------|-----------|-----------------------|------------|------|-------------------------|-------------|
|           |           |                       |            |      | Lower Bound             | Upper Bound |
| 1         | 2         | -10.02667*            | 1.12604    | .000 | -12.3458                | -7.7075     |
|           | 3         | -.41333               | 1.12604    | .717 | -2.7325                 | 1.9058      |
|           | 4         | -11.27667*            | 1.12604    | .000 | -13.5958                | -8.9575     |
|           | 5         | -5.17500*             | 1.12604    | .000 | -7.4941                 | -2.8559     |
| 2         | 1         | 10.02667*             | 1.12604    | .000 | 7.7075                  | 12.3458     |
|           | 3         | 9.61333*              | 1.12604    | .000 | 7.2942                  | 11.9325     |
|           | 4         | -1.25000              | 1.12604    | .278 | -3.5691                 | 1.0691      |
|           | 5         | 4.85167*              | 1.12604    | .000 | 2.5325                  | 7.1708      |
| 3         | 1         | .41333                | 1.12604    | .717 | -1.9058                 | 2.7325      |
|           | 2         | -9.61333*             | 1.12604    | .000 | -11.9325                | -7.2942     |
|           | 4         | -10.86333*            | 1.12604    | .000 | -13.1825                | -8.5442     |
|           | 5         | -4.76167*             | 1.12604    | .000 | -7.0808                 | -2.4425     |
| 4         | 1         | 11.27667*             | 1.12604    | .000 | 8.9575                  | 13.5958     |
|           | 2         | 1.25000               | 1.12604    | .278 | -1.0691                 | 3.5691      |
|           | 3         | 10.86333*             | 1.12604    | .000 | 8.5442                  | 13.1825     |
|           | 5         | 6.10167*              | 1.12604    | .000 | 3.7825                  | 8.4208      |
| 5         | 1         | 5.17500*              | 1.12604    | .000 | 2.8559                  | 7.4941      |
|           | 2         | -4.85167*             | 1.12604    | .000 | -7.1708                 | -2.5325     |
|           | 3         | 4.76167*              | 1.12604    | .000 | 2.4425                  | 7.0808      |
|           | 4         | -6.10167*             | 1.12604    | .000 | -8.4208                 | -3.7825     |

\*. The mean difference is significant at the .05 level.

## 2 Supplementary Figures and Tables

## 2.1 Supplementary Figures

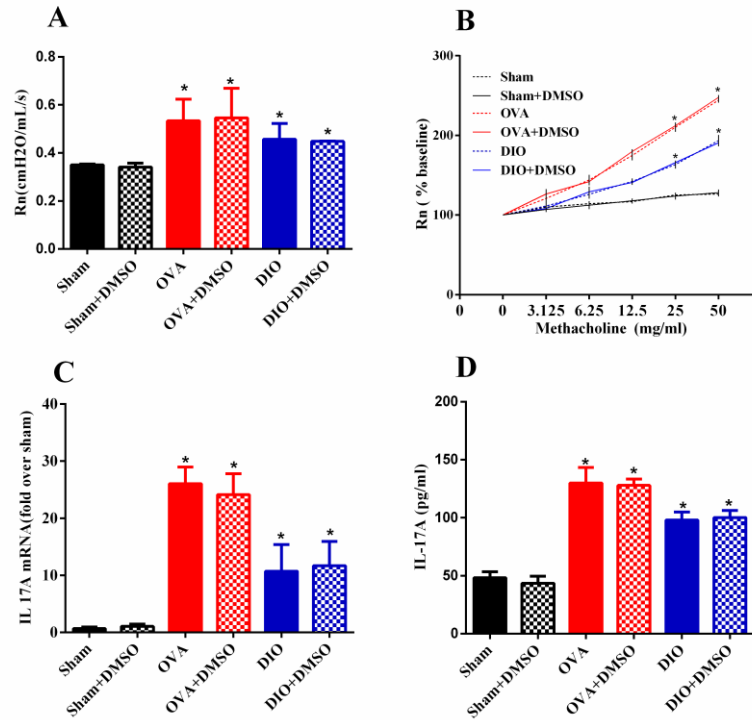

**Supplementary Figure 1. Repetitive oral delivery of DMSO did not cause nonspecific inflammation.** (A, B) Airway resistance was determined by mouse ventilator and forced oscillation technique within 24 hrs. after last challenge. Rn was measured at every concentration of methacholine. (C) Expression of IL-17A mRNA in the lung was determined by quantitative real-time RT-PCR. (D) IL-17A production was measured by ELISA assay. All the data were expressed as mean  $\pm$  SD (n=6). \*  $P < 0.05$  compared with Sham group.

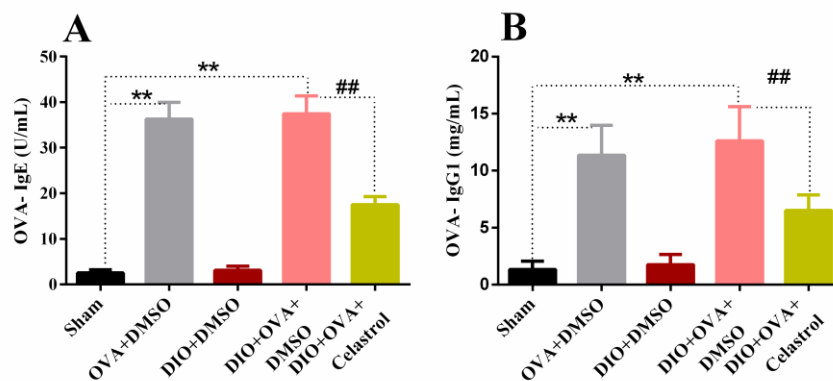

**Supplementary Figure 2. Th2 specific antigens were not dominant in obese asthmatic mice.** (A) Serum OVA-specific IgE and (B) IgG1 productions were measured by ELISA assay. The data were expressed as mean  $\pm$  SD (n=6). \*\*  $P < 0.01$  compared with Sham group, ##  $P < 0.01$  compared with DIO+OVA+DMSO group.
